# Supplementary material for: A primary role of TET proteins in establishment and maintenance of De Novo bivalency at CpG islands
Source: PubMed Central journal article supplement — Nucleic Acids Res. 2016 Jun 10;44(18):8682–92. doi: 10.1093/nar/gkw529 (PMC5062965; doi:10.1093/nar/gkw529), 2016-06-10

**Supplementary Table 1. RT-qPCR primers**

| <b>Primer name</b> | <b>Sequence</b>      | <b>Amplified regions</b>    |
|--------------------|----------------------|-----------------------------|
| CD133-F            | TTGTGGCAAATCACCAGGTA | NM_006017.2<br>742-903      |
| CD133-R            | TCAGATCTGTGAACGCCTTG |                             |
| KRT19-F            | TTTGAGACGGAACAGGCTCT | NM_002276.4<br>647-857      |
| KRT19-R            | AATCCACCTCCACACTGACC |                             |
| LAD1-F             | ACCTACAGCAGCTCCCTCAA | NM_005558.3<br>1316-1479    |
| LAD1-R             | ATGGCCGTGTGGTATCTCTC |                             |
| SHE-F              | AAGCAGCAAGAGACGGTCAT | NM_001010846.2<br>601-809   |
| SHE-R              | TCACAGGGACTGTCAAGCAG |                             |
| ID1-F              | AAACGTGCTGCTCTACGACA | NM_181353.2<br>291-407      |
| ID1-R              | TAGTCGATGACGTGCTGGAG |                             |
| GAPDH-F            | CGACCACTTTGTCAAGCTCA | NM_001289746.1<br>1086-1288 |
| GAPDH-R            | AGGGGAGATTCAGTGTGGTG |                             |

**Supplementary Table 2. Sequenom MassARRAY primers**

| <b>Primer name</b> | <b>Sequence</b>              | <b>Amplified regions</b>                   |
|--------------------|------------------------------|--------------------------------------------|
| CD133-F            | GTTAGATGGAGAATTGGGGTGTTTA    | NC_000004.11, Chr4:<br>16084085-16084583   |
| CD133-R            | AACTCCAAAAACAACCTATTACAAAA   |                                            |
| KRT19-F            | TATTTTGTTTAGGTAGGAGGTTAGG    | NC_000017.10, Chr17:<br>39684206-39684672  |
| KRT19-R            | CTCTCAAAAACCTACAAATTCCTCA    |                                            |
| LAD1-F             | TTTAAAGTTTAGTATTAGGGAGTAAGGA | NC_000001.10, Chr1:<br>201368747-201369194 |
| LAD1-R             | AAAACCTCCTACTCAAACCAATCC     |                                            |
| SHE-F              | AAGTGGTTTAAGGAGTTTTTTTTGAA   | NC_000001.10, Chr1:<br>154473923-154474385 |
| SHE-R              | ACTTAATAATCTTACCCTTATCCAATC  |                                            |
| ID1-F              | TTAGGGATTTTTAGTTGGAGTTGAA    | NC_000020.10, Chr20:<br>30193495-30193949  |
| ID1-R              | TTCCTCTACCCCCTAAATAACTAAA    |                                            |

**Supplementary Table 3. (h) MeDIP-qPCR and ChIP-qPCR primers**

| <b>Primer name</b> | <b>Sequence</b>      | <b>Amplified regions</b>                  |
|--------------------|----------------------|-------------------------------------------|
| CD133-F            | CCCAGTGGATGGAAAGAAGA | NC_000004.11,<br>Chr4:16084979-16085207   |
| CD133-R            | ACTGGGGGTGTACAGTGAGG |                                           |
| KRT19-F            | GTCGCGGATCTTCACCTCTA | NC_000017.10,<br>Chr17:39684158-39684346  |
| KRT19-R            | TTTGTGTCCTCGTCCTCCTC |                                           |
| LAD1-F             | TAGGCCTCGCTGAGATGAAT | NC_000001.10,<br>Chr1:201369024-201369172 |
| LAD1-R             | CAAGGACAGTGCCTTTGACA |                                           |
| SHE-F              | GTCCACCTTGATGAGCCTGT | NC_000001.10,<br>Chr1:154474050-154474184 |
| SHE-R              | AGCCTGCAGGGTCTGATTC  |                                           |
| ID1-F              | AAACGTGCTGCTCTACGACA | NC_000020.10,<br>Chr20:30193376-30193492  |
| ID1-R              | TAGTCGATGACGTGCTGGAG |                                           |
| C1orf14-F          | CAGCACTTCGTCGCAATACA | NC_000001.10,<br>Chr1:182921876-182921983 |
| C1orf14-R          | GTGCCTGAGGATGAAGAGGA |                                           |
| Evpl-1F            | GGCTTTCTGCTGTTTCTGCT | NT_165773.2,<br>Chr11:27624419-27624638   |
| Evpl-1R            | CCGAGTGTGGGAGATCCTTA |                                           |
| H2-T22-F           | CTCAGGGGACATGGAGTGAT | NT_039649.7,<br>Chr17:22362837-22362982   |
| H2-T22-R           | AGTATTGGGAGCGGGAGACT |                                           |
| Keng1-F            | GAGCTGCTGACGGTCTTACC | NT_039207.7,<br>Chr2:109135252-109135352  |
| Keng1-R            | CCTGTCCGTTCTGTTTGTC  |                                           |
| Slc25a31-F         | GCGTCCTCCAAGCAGATAAG | NT_039229.7,<br>Chr3:58531-58646          |
| Slc25a31-R         | TATGGGATGCTAAGGCCAAG |                                           |
| D1pas1-F           | TGACAAAGCAGACGAGGATG | NT_039189.7,<br>Chr1:3464325-3464463      |
| D1pas1-R           | GTTATTCCCTGTCGCCTCAA |                                           |
| Act17b-F           | CTGGGCAGAGGAGACTCAAC | NT_109315.4,<br>Chr4:14592202-14592309    |
| Act17b-R           | CTGGCTTCAAGGAGGAGATG |                                           |

## Supplementary Figure Legends

**Supplementary Figure S1.** Identification of 293T cells overexpressing TET2-WT and TET2-Mut. (A) Immunofluorescence analysis of TET2 in Mock, TET2-WT, and TET2-Mut 293T cells. (B) Immunofluorescence analysis of 5hmC in Mock, TET2-WT, and TET2-Mut 293T cells. (C) Dot blot analysis of 5hmC and 5mC in Mock, TET2-WT, and TET2-Mut 293T cells.

**Supplementary Figure S2.** Numbers of DHMRs (A) and DMRs (B) in TET2-WT and TET2-Mut cells (vs. Mock cells) at CGIs.

**Supplementary Figure S3.** MeDIP-qPCR analysis for 5mC at four representative hypermethylated CGIs. The *ID1* gene CGI was used as a negative control. Data are presented as mean  $\pm$  SD (n=3). \* $P$ <0.05.

**Supplementary Figure S4.** Effect of TET2 overexpression on H3K4me1, H3K4me2, H3K9me2 and H3K9me3 enrichment at four representative hypermethylated CGIs in 293T cells. ChIP-qPCR analysis of H3K4me1 (A), H3K4me2 (B), H3K9me2 (C), and H3K9me3 (D) in Mock, TET2-WT, and TET2-Mut 293T cells. The *ID1* gene CGI was used as a control. Data are presented as mean  $\pm$  SD (n=3). \* $P$ <0.05.

**Supplementary Figure S5.** ChIP-qPCR analysis of histone H3 occupation at four representative hypermethylated CGIs in Mock, TET2-WT, and TET2-Mut 293T cells. *ID1* and *C1orf14* gene CGIs were used as a control. Data are presented as mean  $\pm$  SD (n=3). \* $P$ <0.05.

**Supplementary Figure S6.** Effect of TET2 overexpression on the global levels of histone modifications in 293T cells. Representative Western blot analysis of the global H3K4me3 and H3K27me3 levels in Mock, TET2-WT, and TET2-Mut 293T cells. Histone H4 was used as loading control.

**Supplementary Figure S7.** RT-qPCR analysis of the mRNA expression of four representative hypermethylated CGI genes in Mock, TET2-WT, and TET2-Mut 293T cells. The *ID1* gene was used as a control. The mRNA expression levels are normalized to the value in Mock cells. Data are presented as mean  $\pm$  SD (n=6). \* $P$ <0.05.

**Supplementary Figure S8.** Effect of 5-Aza-CdR treatment on the bivalency formation at the representative CGI promoters and the gene expression of corresponding genes. (A) H3K4me3 ChIP-qPCR analysis. (B) H3K27me3 ChIP-qPCR analysis. (C) RT-qPCR analysis. (D) Sequential ChIP-qPCR analysis of 5-Aza-CdR-treated 293T cells. Upper panel is the result of the 1<sup>st</sup> ChIP using IgG and anti-H3K4me3 Ab. Lower panel is the result of the 2<sup>nd</sup> ChIP using IgG and anti-H3K27me3 Ab. The % IP in the 2<sup>nd</sup> ChIP was plotted relative to input in the eluate from the first round ChIP. *ID1* gene was used as a control for all data. All data are presented as mean  $\pm$  SD (n=3). \* $P$ <0.05.

**Supplementary Figure S9.** Venn diagram shows the overlapping of H3K4me3 peaks (A), H3K27me3 peaks (B) and bivalent domains (C) between Mock and TET2-WT 293T cells.

**Supplementary Figure S10.** UCSC browser snapshots of H3K4me3 and H3K27me3 enrichment on two representative hypermethylated CGI genes (*LAD1* and *SHE*).

**Supplementary Figure S11.** Venn diagram shows the overlapping of H3K4me3 peaks (A), H3K27me3 peaks (B) and bivalent domains (C) at CGIs between Mock and TET2-Mut 293T cells.

**Supplementary Figure S12.** (A) Gene ontology (GO) analysis of the “gain-of-bivalency” genes in TET2-WT 293T cells compared with Mock 293T cells. (B) Venn diagram shows the overlapping between the “gain-of-bivalency” genes in

TET2-WT 293T cells and the bivalent genes in human ES cells.

**Supplementary Figure S13.** Average distribution patterns of 5mC (A), 5hmC (B), H3K4me3 (C) and H3K27me3 (D) across 4010 reported bivalent domains in wild type (Black) and *Tet1/2*-DKO (Blue) mouse ES cells.

**Supplementary Figure S14.** MeDIP-qPCR, hMeDIP-qPCR, and ChIP-qPCR analysis of 5mC (A), 5hmC (B), H3K4me3 (C), and H3K27me3 (D) enrichment at several selected CGIs in wild type and *Tet1/2*-DKO mouse ES cells. Data are presented as mean  $\pm$  SD (n=3). \* $P$ <0.05.

Supplementary Figure S1

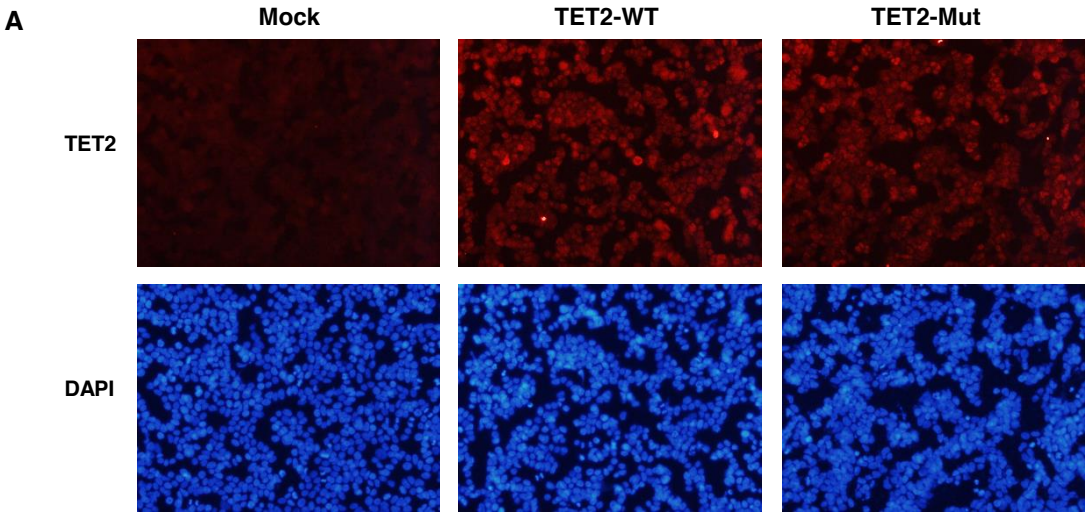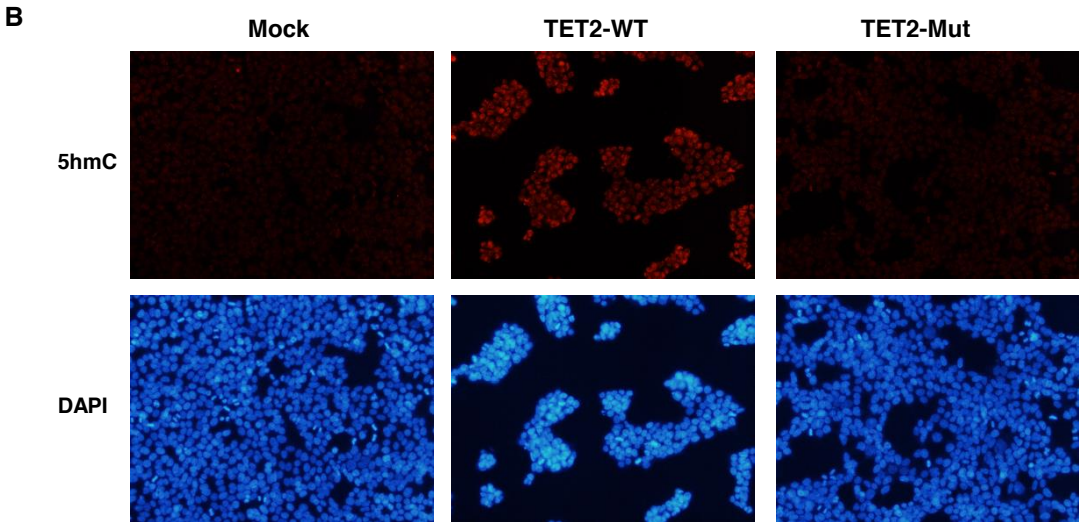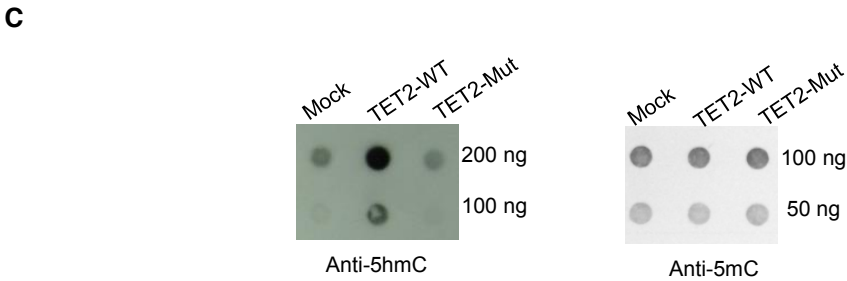

## Supplementary Figure S2

**A**

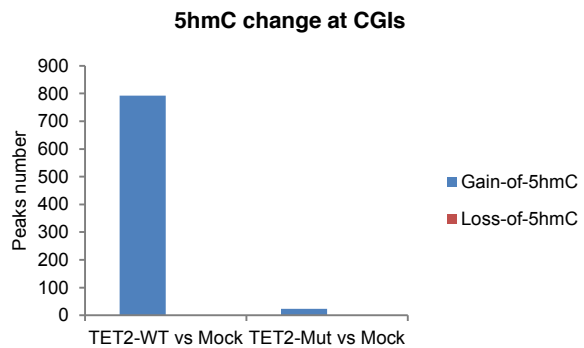

**B**

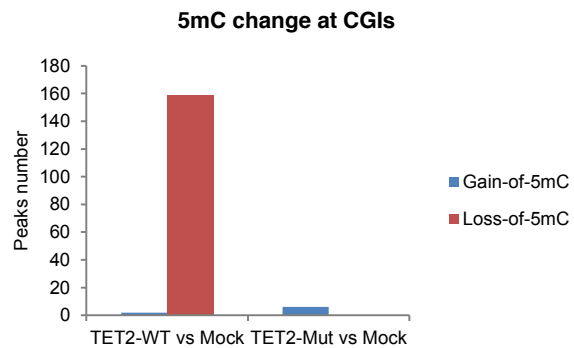



### Supplementary Figure S3

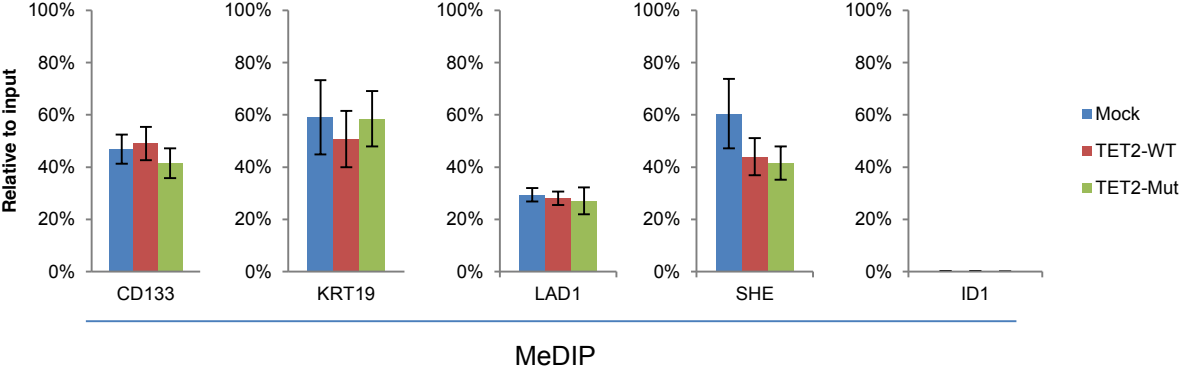

## Supplementary Figure S4

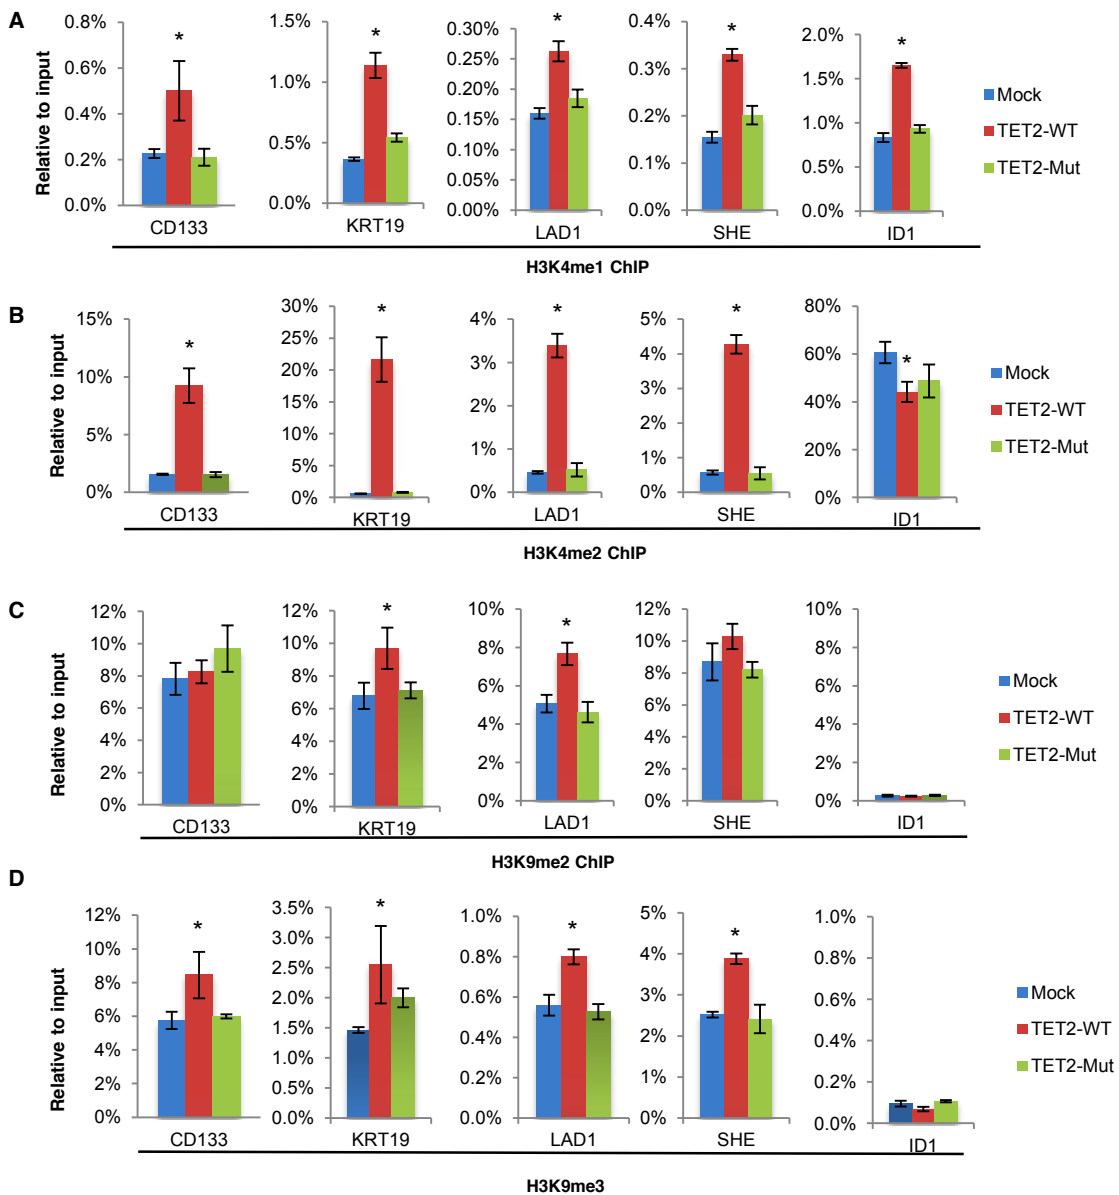

# Supplementary Figure S5

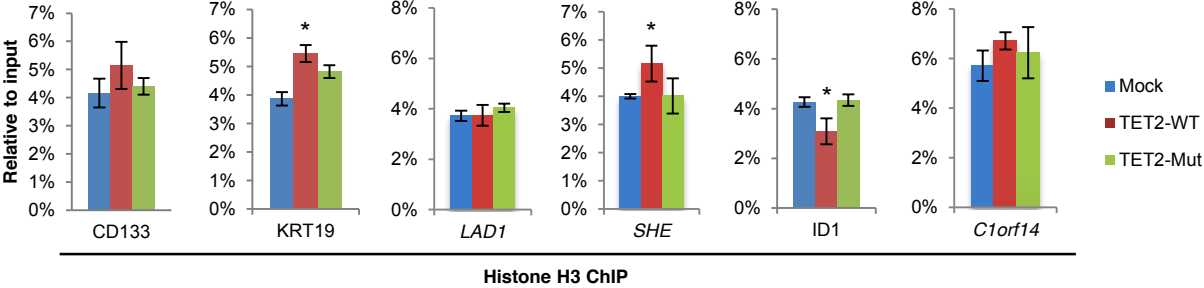

Supplementary Figure S6

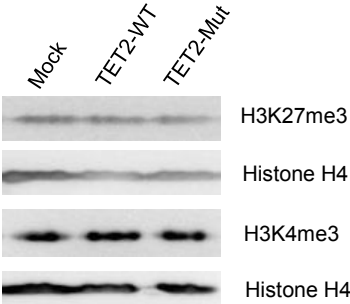

# Supplementary Figure S7

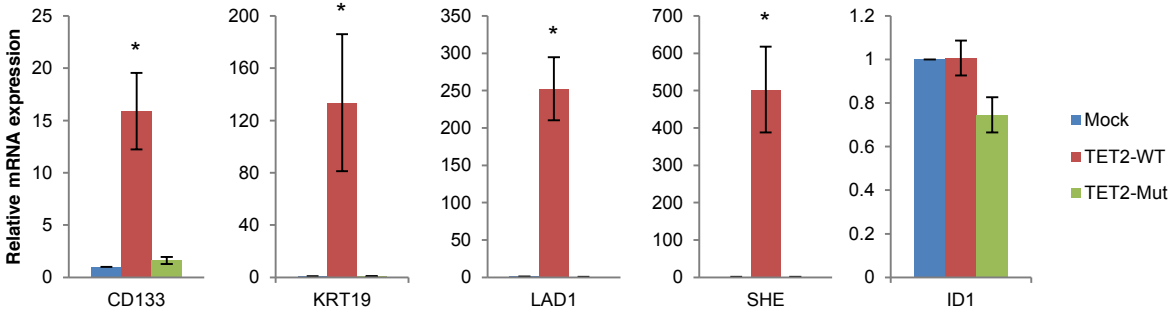

## Supplementary Figure S8

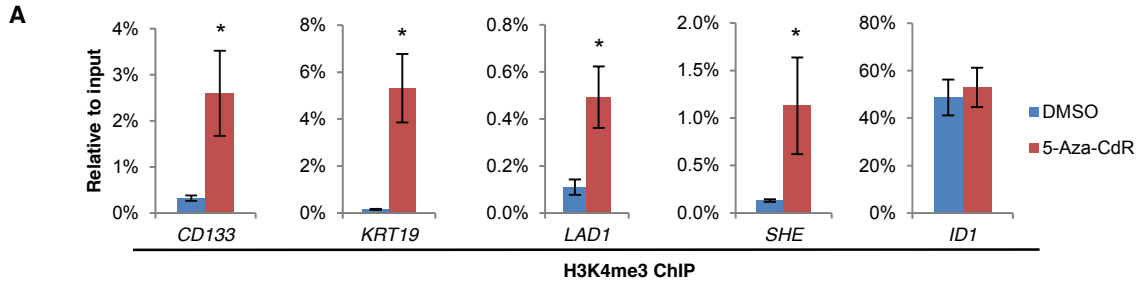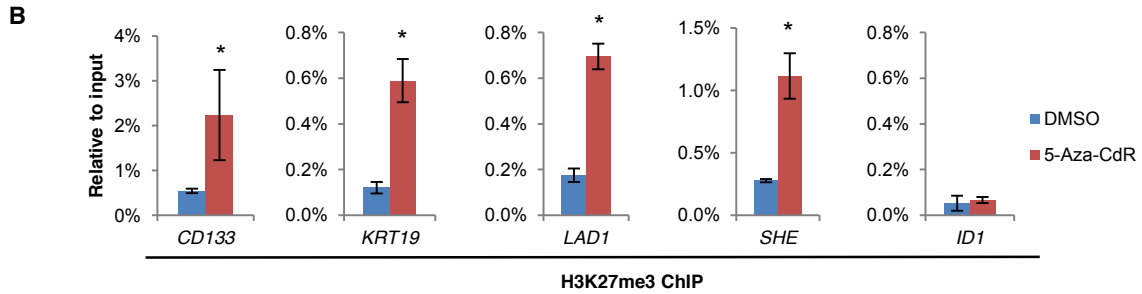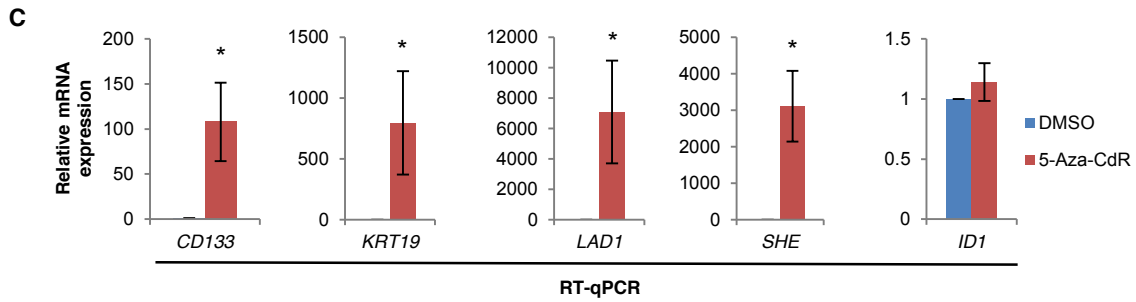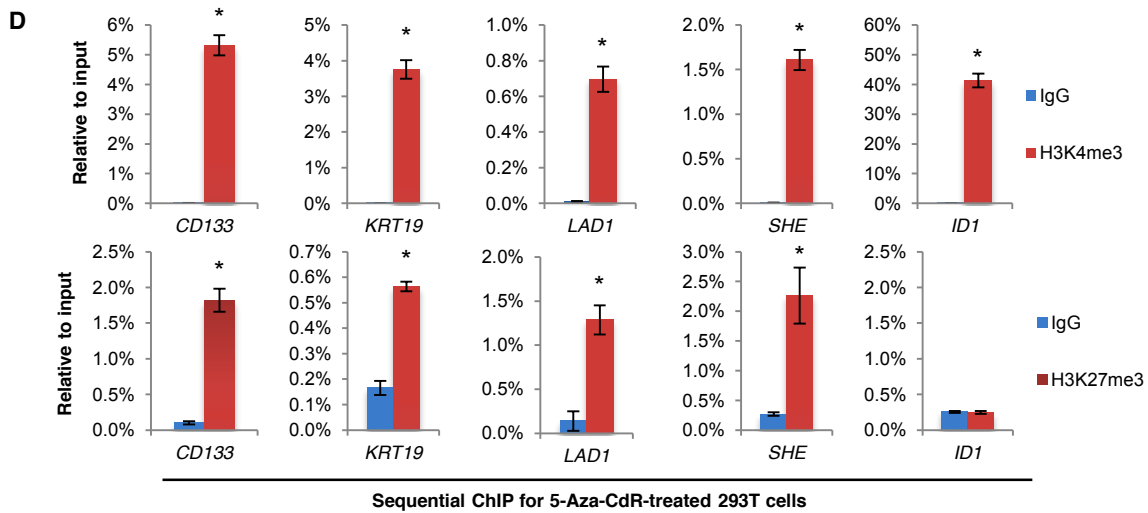

Supplementary Figure S9

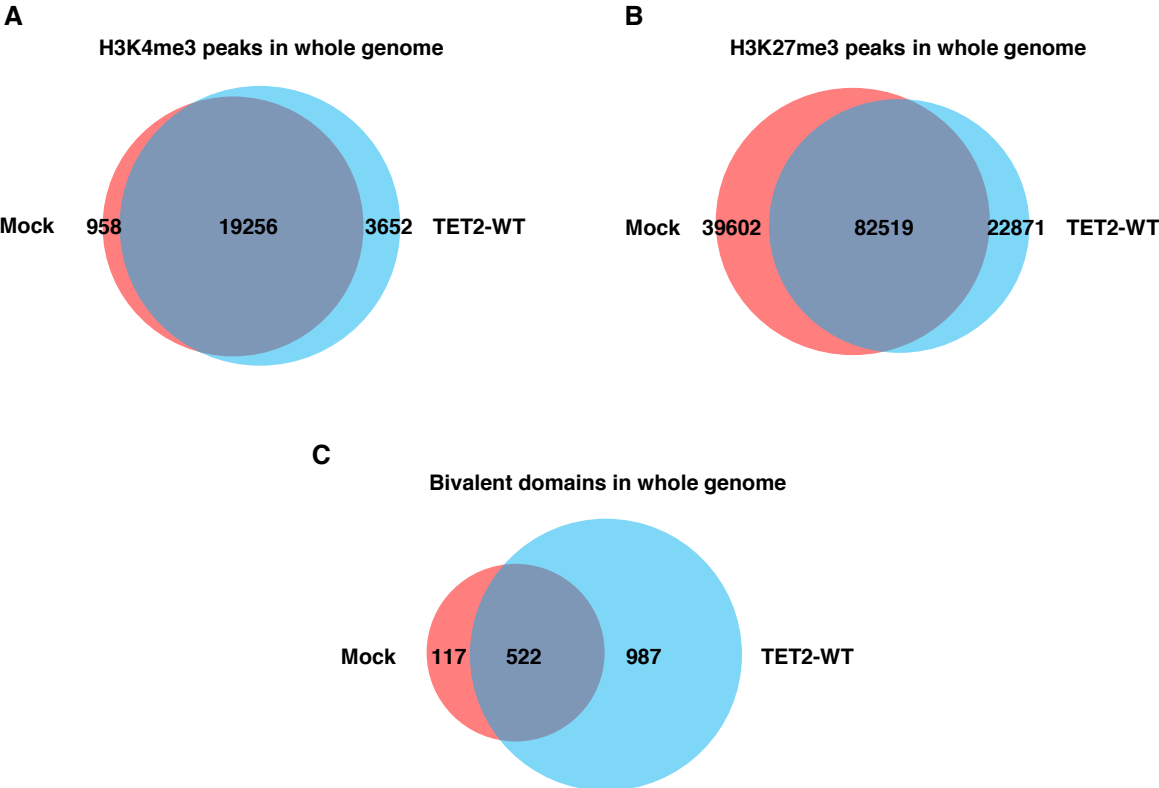

Supplementary Figure S10

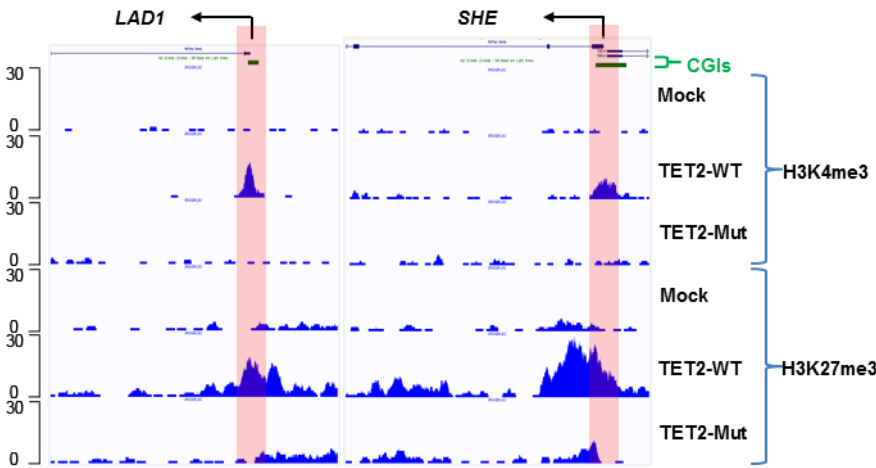



Supplementary Figure S11

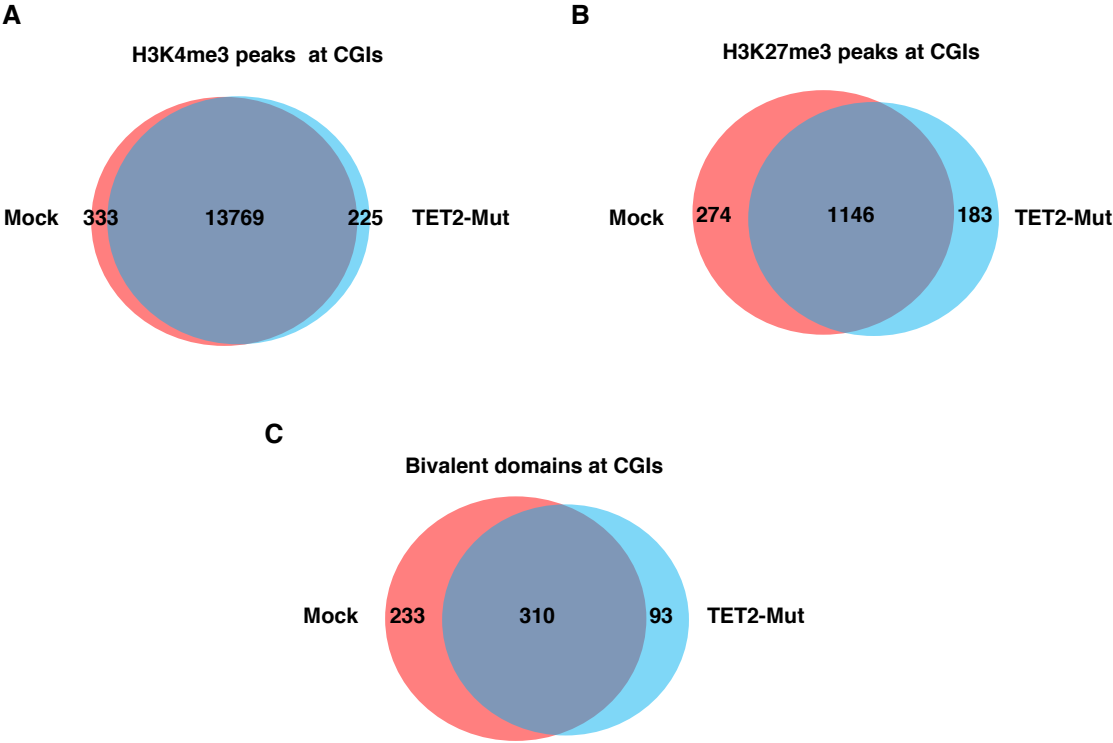

## Supplementary Figure S12

**A**

### GO analysis of genes gaining bivalent domains at CGIs

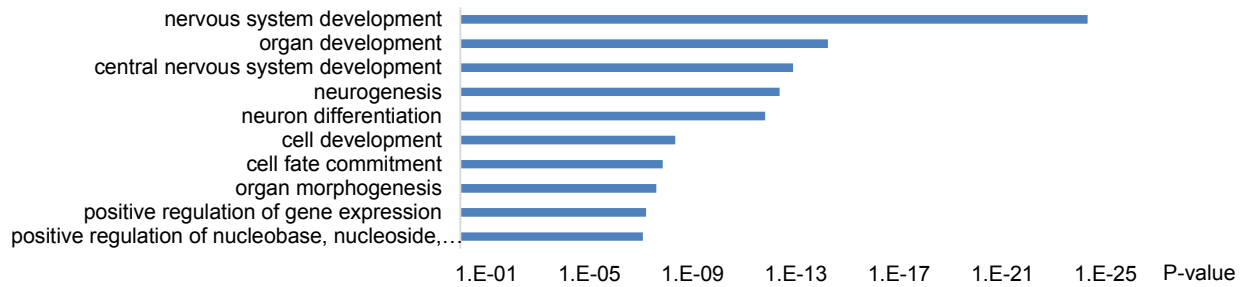

**B**

### "Gain-of-bivalency" genes at CGIs

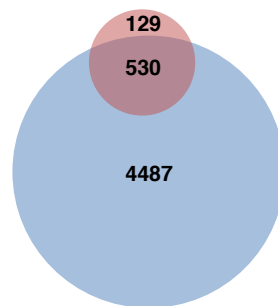

**Bivalent genes in hES cells**

Supplementary Figure S13

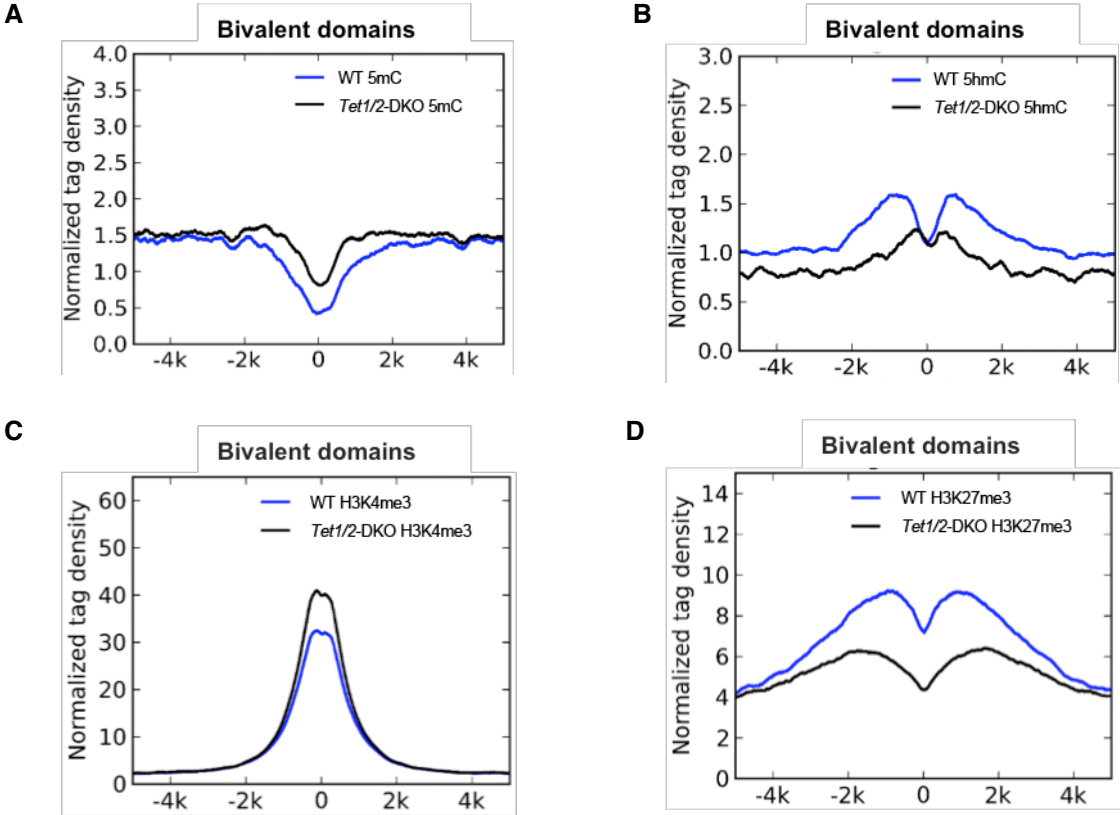

# Supplementary Figure S14

**A**

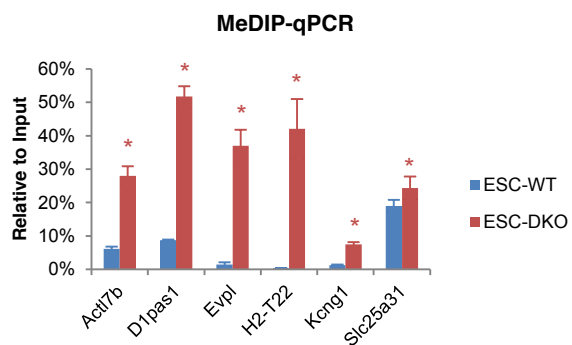

**B**

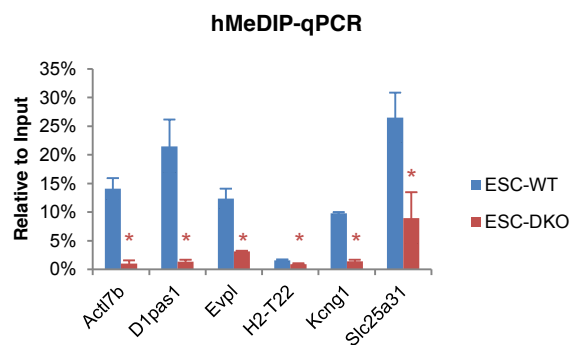

**C**

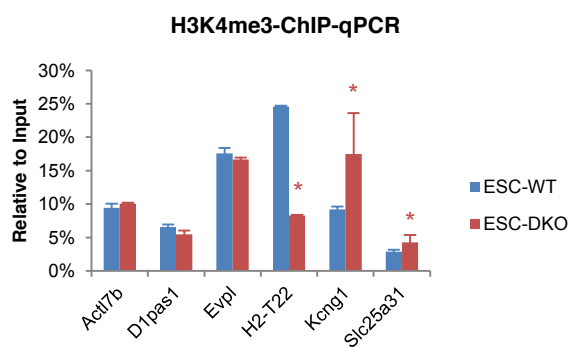

**D**

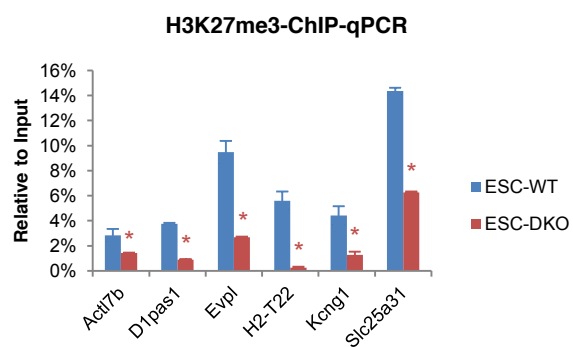

Supplement: supp_gkw529_nar-02612-x-2015-File003.pdf [file supp_gkw529_nar-02612-x-2015-File003.pdf]
